# Supplementary material for: Transcription profiling of butanol producer Clostridium beijerinckii NRRL B-598 using RNA-Seq
Source: PubMed Central journal article supplement (PMC5975590; doi:10.1186/s12864-018-4805-8), 2018-05-30
Supplement: 12864_2018_4805_MOESM1_ESM.pdf [file 12864_2018_4805_MOESM1_ESM.pdf]

**Additional file 1: Snapshots from microscopic observation during cultivation**

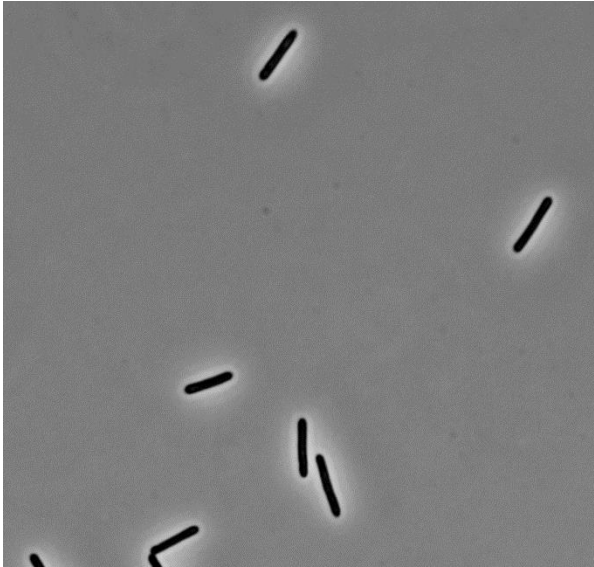

**1h**

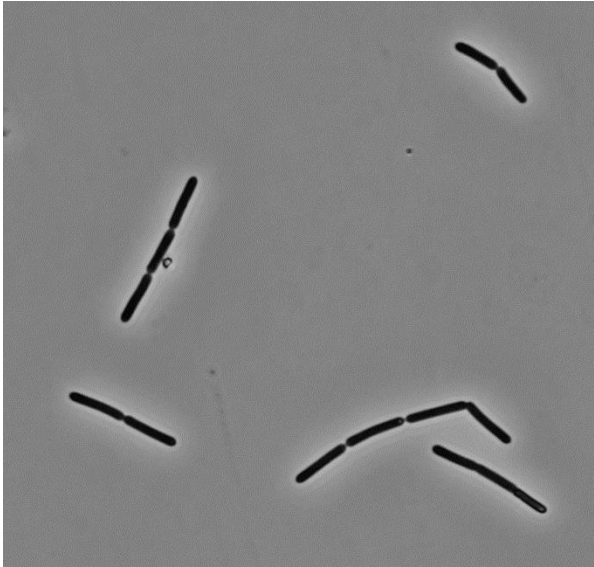

**6h (T2)**

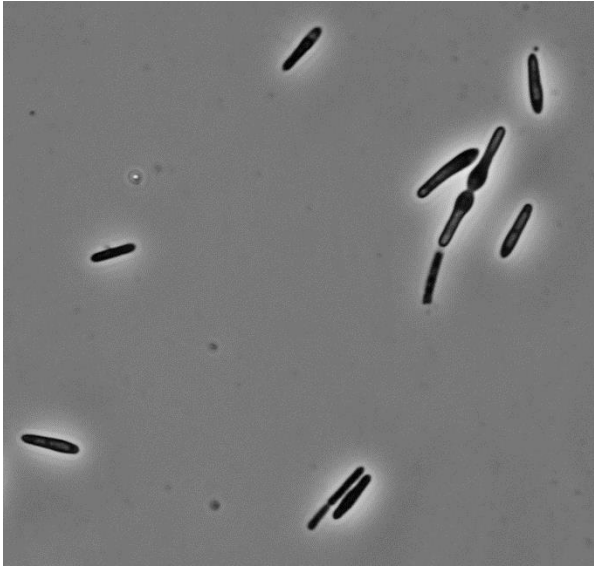

**8.5h (T3)**

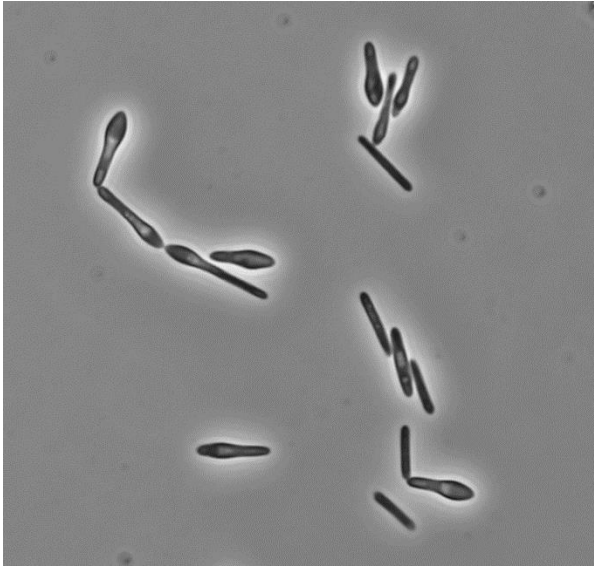

**13h (T4)**

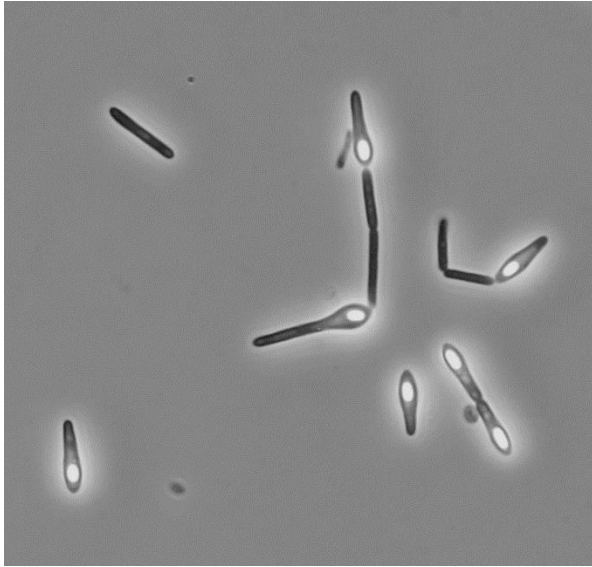

18h (T5)

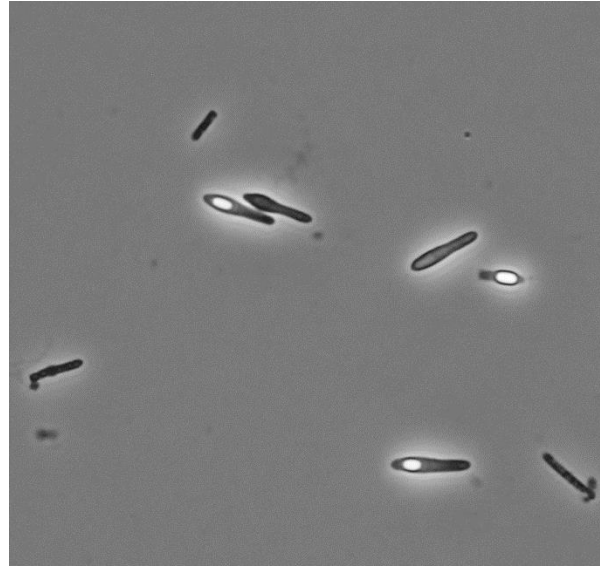

23h (T6)

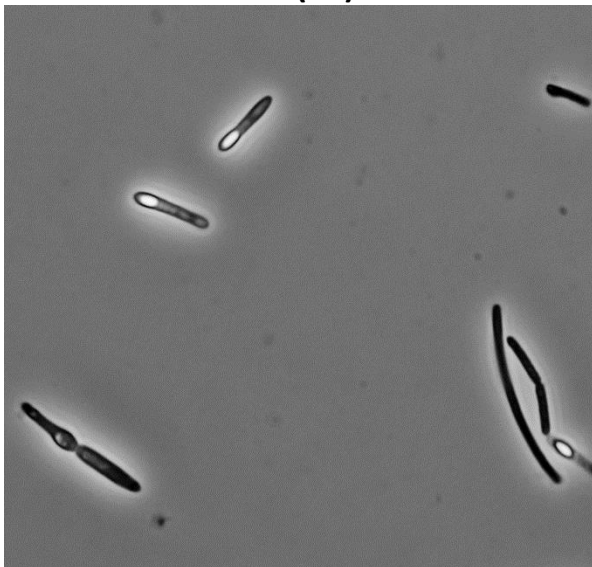

28h

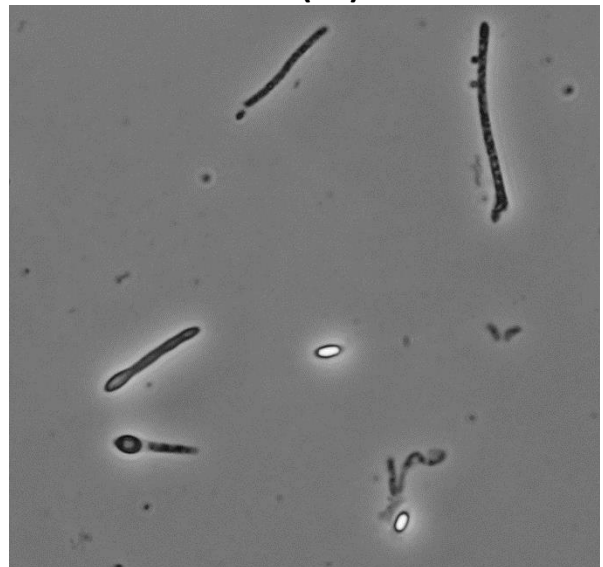

33h

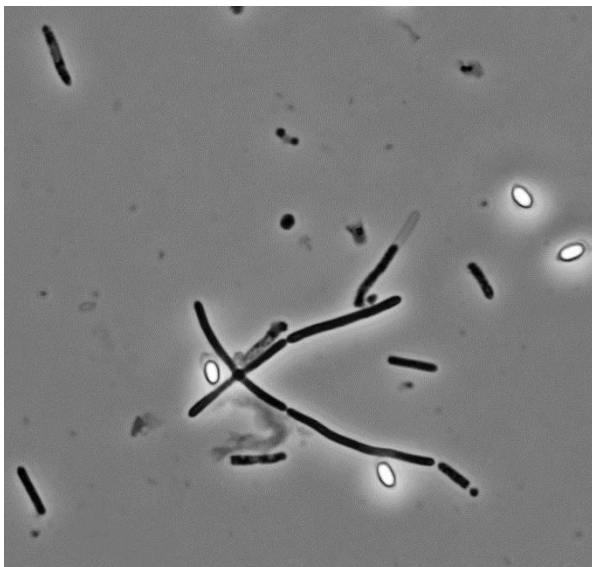

48h
