# Supplementary material for: Transcription profiling of butanol producer Clostridium beijerinckii NRRL B-598 using RNA-Seq
Source: PubMed Central journal article supplement (PMC5975590; doi:10.1186/s12864-018-4805-8), 2018-05-30
Supplement: 12864_2018_4805_MOESM2_ESM.pdf [file 12864_2018_4805_MOESM2_ESM.pdf]

## Additional file 2: Silent pseudogenes

| Locus tag    | Length | Position         | Reason        | Description                            |
|--------------|--------|------------------|---------------|----------------------------------------|
| X276_RS00260 | 255    | 57447..57701     | missing start | two-component sensor histidine kinase  |
| X276_RS07565 | 582    | 1689595..1690176 | missing start | dioxygenase                            |
| X276_RS09090 | 90     | 1997165..1997254 | missing start | transposase                            |
| X276_RS10345 | 345    | 2290821..2291165 | missing start | fructose-6-phosphate aldolase          |
| X276_RS10405 | 126    | 2307301..2307426 | missing start | ATPase                                 |
| X276_RS11265 | 297    | 2501800..2502096 | frameshifted  | hypothetical protein                   |
| X276_RS11380 | 252    | 2530485..2530736 | missing start | NimC/NimA family protein               |
| X276_RS11630 | 651    | 2572388..2573038 | internal stop | polysaccharide deacetylase             |
| X276_RS11650 | 428    | 2575278..2575705 | frameshifted  | hypothetical protein                   |
| X276_RS12805 | 1274   | 2847476..2848749 | frameshifted  | PTS galactitol transporter subunit IIC |
| X276_RS14035 | 444    | 3118166..3118609 | missing start | 4Fe-4S ferredoxin                      |
| X276_RS14730 | 459    | 3297305..3297763 | missing start | hypothetical protein                   |
| X276_RS14985 | 379    | 3362166..3362544 | missing start | 3-beta hydroxysteroid dehydrogenase    |
| X276_RS15030 | 581    | 3373053..3373633 | frameshifted  | hypothetical protein                   |
| X276_RS15335 | 485    | 3445278..3445762 | frameshifted  | hypothetical protein                   |
| X276_RS15510 | 309    | 3480030..3480338 | missing start | 40-residue YVTN family beta-propeller  |
| X276_RS15520 | 363    | 3482406..3482768 | missing start | alkyl hydroperoxide reductase          |
| X276_RS15650 | 102    | 3505764..3505865 | missing start | hypothetical protein                   |
| X276_RS17205 | 396    | 3860781..3861176 | internal stop | hypothetical protein                   |
| X276_RS18855 | 296    | 4191322..4191617 | frameshifted  | hypothetical protein                   |
| X276_RS20640 | 759    | 4603594..4604352 | missing stop  | histidine kinase                       |
| X276_RS20720 | 364    | 4620598..4620961 | missing stop  | hypothetical protein                   |
| X276_RS21535 | 1012   | 4798160..4799171 | frameshifted  | DNA-binding response regulator         |
| X276_RS26610 | 285    | 6080564..6080848 | missing stop  | hypothetical protein                   |
