# Supplementary material for: Transcription profiling of butanol producer Clostridium beijerinckii NRRL B-598 using RNA-Seq
Source: PubMed Central journal article supplement (PMC5975590; doi:10.1186/s12864-018-4805-8), 2018-05-30
Supplement: 12864_2018_4805_MOESM3_ESM.pdf [file 12864_2018_4805_MOESM3_ESM.pdf]

### Additional file 3: Putative active genes misidentified as pseudogenes due to assembly errors

| Locus tag    | Length | Position         | Reason       | Description                                                                                       | RPKM |     |      |     |     |     |
|--------------|--------|------------------|--------------|---------------------------------------------------------------------------------------------------|------|-----|------|-----|-----|-----|
|              |        |                  |              |                                                                                                   | 3.5h | 6h  | 8.5h | 13h | 18h | 23h |
| X276_RS05310 | 1250   | 1181908..1183157 | frameshifted | phosphoribosylamine--glycine ligase                                                               | 38   | 59  | 202  | 64  | 48  | 53  |
| X276_RS06945 | 722    | 1541349..1542070 | frameshifted | 1-(5-phosphoribosyl)-5-[(5-phosphoribosylamino)methylideneamino]imidazole-4-carboxamide isomerase | 100  | 82  | 74   | 83  | 73  | 64  |
| X276_RS07745 | 797    | 1717089..1717885 | frameshifted | TIGR00266 family protein                                                                          | 21   | 29  | 32   | 39  | 37  | 31  |
| X276_RS08460 | 2219   | 1861491..1863709 | frameshifted | dolichyl-phosphate-mannose--protein mannosyltransferase                                           | 29   | 50  | 33   | 18  | 20  | 38  |
| X276_RS08755 | 2645   | 1929674..1932318 | frameshifted | valine--tRNA ligase                                                                               | 96   | 94  | 68   | 60  | 46  | 45  |
| X276_RS10200 | 238    | 2254697..2254934 | comb. issues | hypothetical protein                                                                              | 385  | 403 | 325  | 149 | 125 | 121 |
| X276_RS12380 | 1025   | 2740860..2741884 | frameshifted | cell wall-binding protein                                                                         | 90   | 116 | 102  | 215 | 176 | 109 |
| X276_RS12465 | 1091   | 2766820..2767910 | frameshifted | phosphoribosylpyrophosphate synthetase                                                            | 135  | 101 | 97   | 108 | 88  | 74  |
| X276_RS13545 | 1058   | 2999949..3001006 | frameshifted | glycosyl transferase family 1                                                                     | 23   | 15  | 14   | 278 | 499 | 423 |
| X276_RS13575 | 1625   | 3011981..3013605 | frameshifted | glycosyl transferase                                                                              | 25   | 21  | 28   | 242 | 377 | 277 |
| X276_RS13580 | 935    | 3013800..3014734 | frameshifted | glycosyl transferase                                                                              | 67   | 40  | 151  | 395 | 351 | 145 |
| X276_RS14990 | 1109   | 3362648..3363756 | frameshifted | Fe-S oxidoreductase                                                                               | 231  | 295 | 545  | 688 | 490 | 306 |
| X276_RS15385 | 473    | 3457842..3458314 | frameshifted | spore coat protein                                                                                | 46   | 19  | 62   | 709 | 514 | 216 |
| X276_RS15660 | 1169   | 3507034..3508202 | frameshifted | sugar kinase                                                                                      | 78   | 72  | 35   | 25  | 30  | 47  |
| X276_RS16200 | 1256   | 3636812..3638067 | frameshifted | amino acid permease-associated protein                                                            | 10   | 12  | 14   | 25  | 18  | 19  |
| X276_RS18130 | 722    | 4052581..4053302 | frameshifted | hypothetical protein                                                                              | 35   | 32  | 24   | 20  | 15  | 16  |
| X276_RS20935 | 1046   | 4662125..4663170 | frameshifted | galactose ABC transporter substrate-binding protein                                               | 37   | 48  | 55   | 89  | 78  | 57  |
| X276_RS21490 | 1685   | 4788285..4789969 | frameshifted | 2-oxoacid:ferredoxin oxidoreductase subunit alpha                                                 | 44   | 26  | 112  | 436 | 354 | 166 |
| X276_RS21750 | 1715   | 4846544..4848258 | frameshifted | dihydroxy-acid dehydratase                                                                        | 13   | 40  | 68   | 79  | 122 | 199 |
| X276_RS22255 | 1043   | 4975478..4976520 | frameshifted | sulfate transporter subunit                                                                       | 198  | 135 | 87   | 90  | 146 | 326 |
| X276_RS23140 | 1079   | 5190079..5191157 | frameshifted | undecaprenyldiphospho-muramoylpentapeptide beta-N-acetylglucosaminyltransferase                   | 32   | 61  | 61   | 57  | 64  | 47  |
| X276_RS23155 | 2912   | 5194118..5197029 | frameshifted | DNA topoisomerase IV                                                                              | 72   | 84  | 76   | 54  | 41  | 46  |
| X276_RS23865 | 1706   | 5377008..5378713 | frameshifted | hybrid sensor histidine kinase/response                                                           | 36   | 38  | 27   | 18  | 21  | 26  |
