# Supplementary material for: Transcription profiling of butanol producer Clostridium beijerinckii NRRL B-598 using RNA-Seq
Source: PubMed Central journal article supplement (PMC5975590; doi:10.1186/s12864-018-4805-8), 2018-05-30

## Additional file 7: Dotplot of *C. beijerinckii* NRRL B-598 and *C. beijerinckii* NCIMB 8052 genome

Dotplots showing that no major rearrangement between the two strains are present.

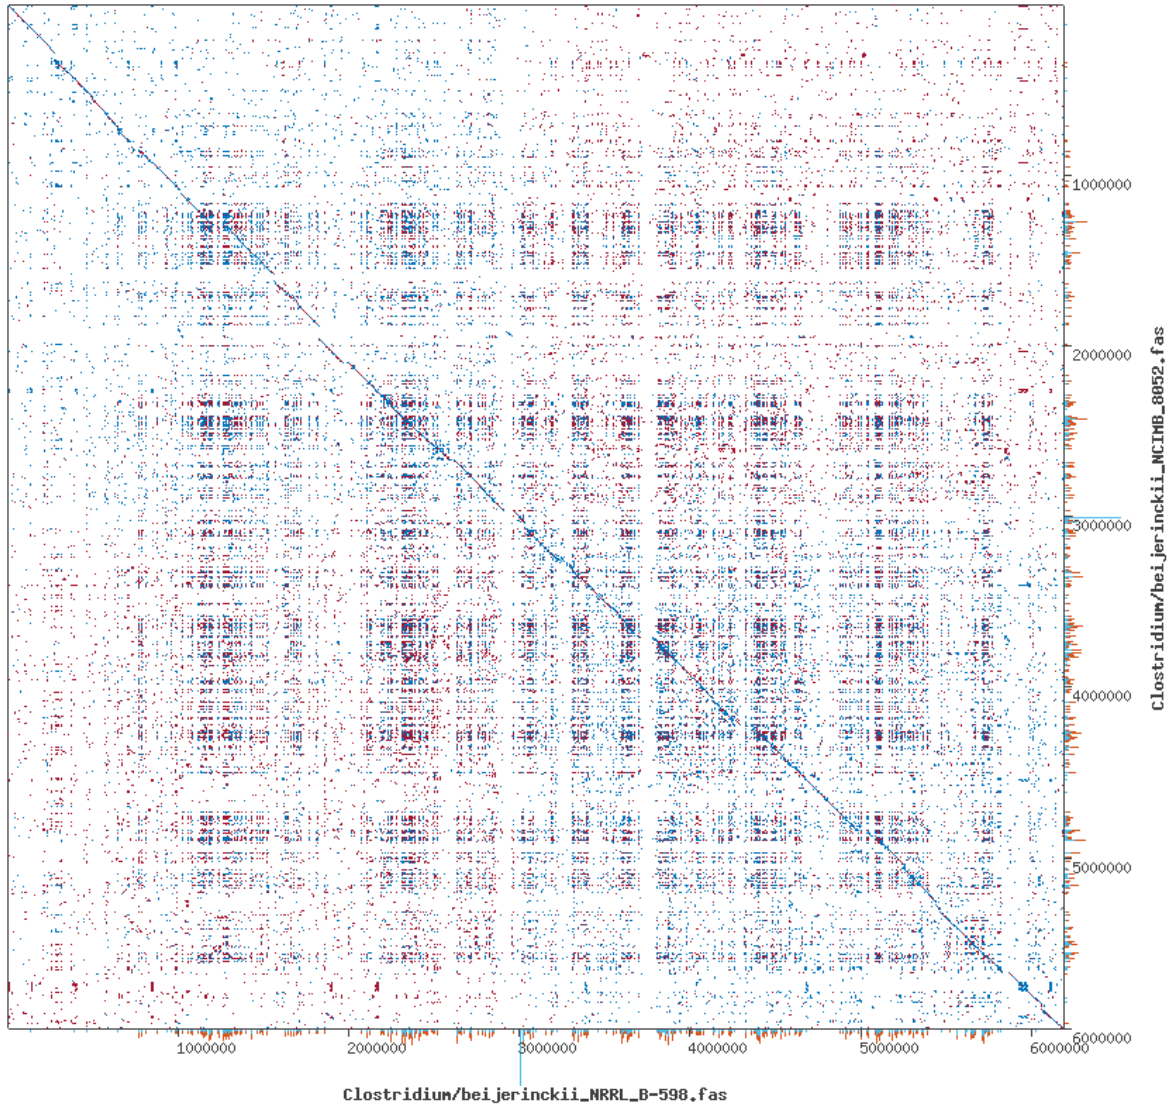

Supplement: 12864_2018_4805_MOESM7_ESM.pdf [file 12864_2018_4805_MOESM7_ESM.pdf]
