# Supplementary material for: Transcription profiling of butanol producer Clostridium beijerinckii NRRL B-598 using RNA-Seq
Source: PubMed Central journal article supplement (PMC5975590; doi:10.1186/s12864-018-4805-8), 2018-05-30
Supplement: 12864_2018_4805_MOESM8_ESM.pdf [file 12864_2018_4805_MOESM8_ESM.pdf]

## Additional file 8: COG functional categories of differential expressed genes

Barplots showing the number of COG categories associated with differentially expressed genes between adjacent time points.

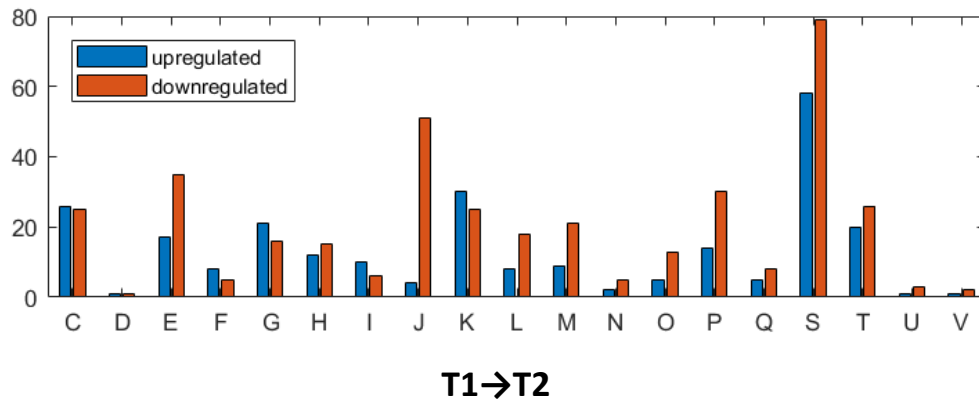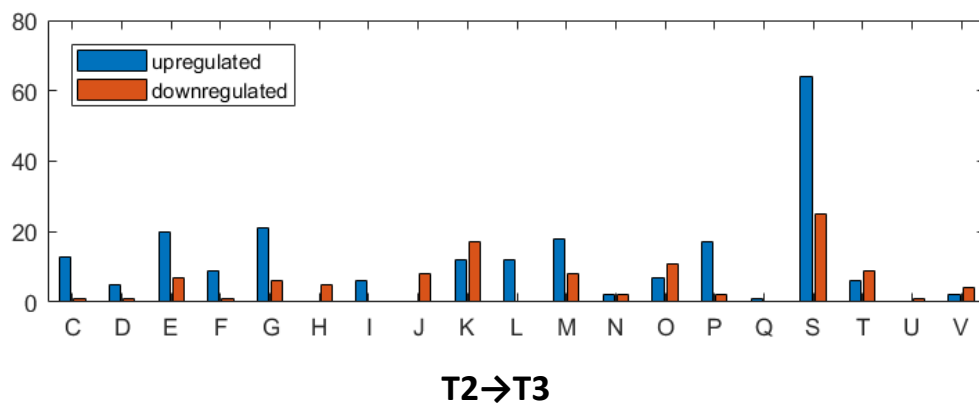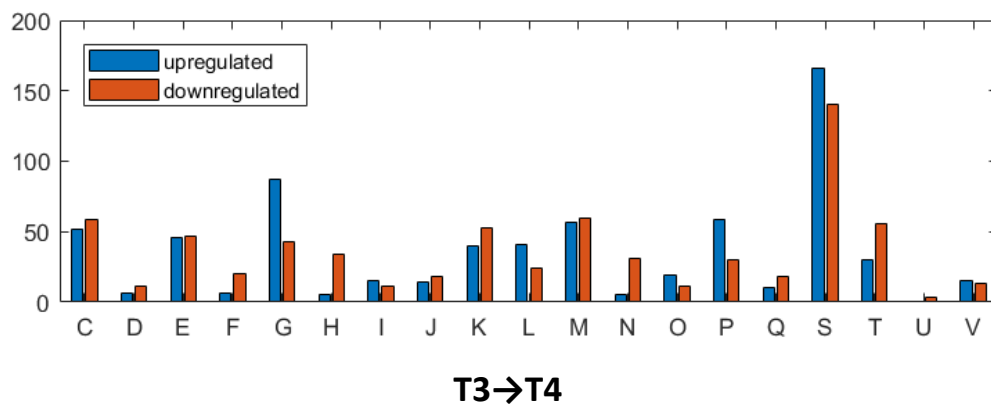

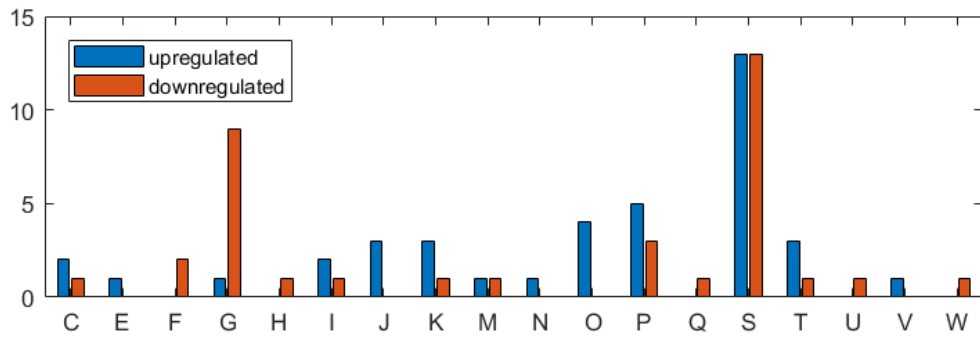

T4→T5

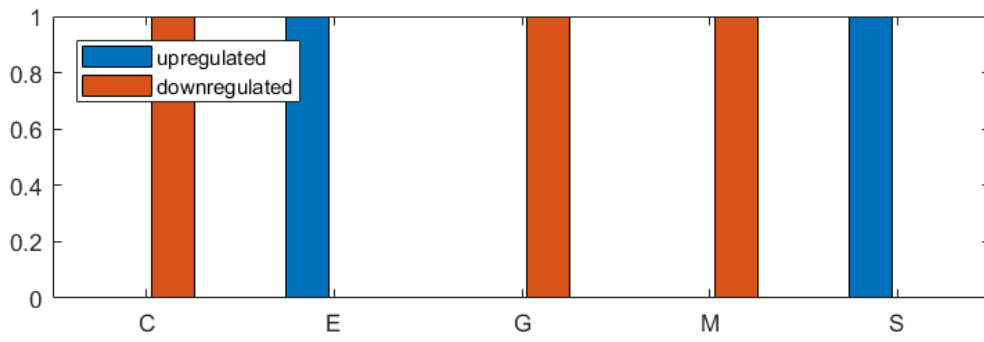

T5→T6
